### Commentary

# Commentary on: An Update on the Posterior Earlobe/Concha Mastoid Suspension Suture to Correct “Pixie Ear” Following Facelift: Review of 40 Cases

Antonio Fuente-del-Campo, MD<sup>o</sup>

Editorial Decision date: December 10, 2020; online publish-ahead-of-print February 5, 2021.

Aesthetic Surgery Journal  
2021, Vol 41(11) NP1366–NP1367  
© The Author(s) 2021. Published by  
Oxford University Press on behalf of  
The Aesthetic Society. All rights re-  
served. For permissions, please e-mail:  
journals.permissions@oup.com  
DOI: 10.1093/asj/sjaa365  
www.aestheticsurgeryjournal.com

**OXFORD**  
UNIVERSITY PRESS

“Pixie ear” is a very obvious and therefore undesirable deformity. Its appearance after a rhytidectomy reflects a procedure in which excessive skin resection was done in the periauricular area and/or insufficient suspension of the deep soft tissues to solid anatomic points. It can also be of congenital origin.

It is a deformity to which little attention has been paid. Surgeons have generally been more concerned with the overall result than with the details. “A big earring solves it”—but it is not like that; the quality of a product is in its fine details. Day by day, patients are becoming more observant, particular, and demanding.

Over the years, various procedures have been proposed for the correction of pixie ear, but as the authors state, rectification differs on whether the defect is congenital or a consequence of rhytidoplasty.<sup>1-3</sup> The fundamental difference is the amount of skin that is available. In the aged patient with redundant skin, it is possible to correct the lobe using one of the various techniques described.<sup>4</sup> But this is not the case in previously intervened patients, limiting surgical options due to the scarcity of local skin.

When correcting pixie ear, it is not enough to eliminate the appearance of a pulled lobe. It is necessary to reconstruct an aesthetic lobe, with a rounded shape and dimensions in proper proportion with the rest of the ear.<sup>5</sup> The length of the lobe should be between 25% and 30% of the total length of the ear. The average lobe is 18 mm long,

20 mm wide, and 8 mm thick. Women like to wear earrings, so they prefer discreetly pendulous lobes. A grade I pendulous lobe is ideal, but a slightly more ptotic one (grade II) will be also acceptable. To achieve this, the surgeon must pay attention to the distance from the intertragal notch and from the anterior ear lobe crease to the subauricular point (Figure 1).

The authors of this article offer us an elegantly simple procedure that rescues the skin of the retroauricular region to free the lobe and correct its contour. An obvious effect, easy to reproduce.<sup>6</sup> They show excellent results, without obvious scars. However, I do not know if scars would be more evident in patients with hyper- or hypochromic scars, and those with darker skin or other peculiar skin characteristics.

I would have liked to see the result of this procedure applied to a young patient with this congenital malformation, in which I suppose it should have equally good results. I commend the authors for their creativity, resulting from their extensive experience and keen sense of observation.

Dr Fuente-del-Campo is a Professor, Universidad Nacional Autónoma de México (UNAM), Mexico City, Mexico.

#### Corresponding Author:

Dr Antonio Fuente del Campo, Vialidad de la Barranca s/n suite 845, Colonia Valle de las Palmas, Huixquilucan, 52763, México.  
E-mail: [afuentedelcampo@prodigy.net.mx](mailto:afuentedelcampo@prodigy.net.mx); Twitter: [@antoniofuented1](https://twitter.com/antoniofuented1)

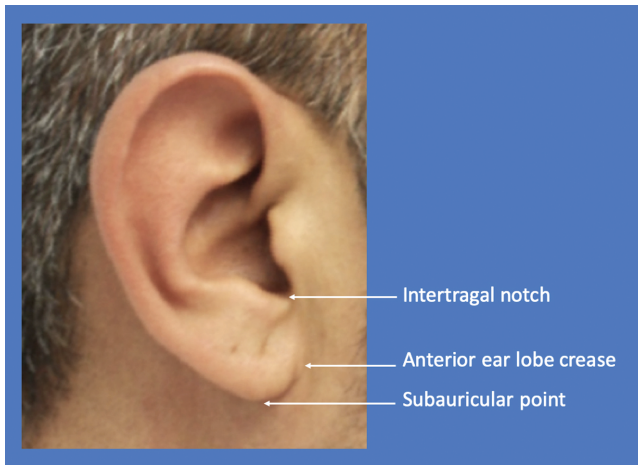

**Figure 1.** Male patient, 42 years old, showing the key points used to determine the proper length of the auricular lobe.

### Disclosures

The author declared no potential conflicts of interest with respect to the research, authorship, and publication of this article.

### Funding

The author received no financial support for the research, authorship, and publication of this article.

### REFERENCES

1. Chen AH, O'Rourke AO, Harper JG, Kamer FM. Repair of the pixie ear deformity with modified V to Y plasty during rhytidectomy. *Am J Cosmc Surg.* 2007;24(3):146-149.
2. Choroomi S, Frankel A. A novel technique of pixie ear correction using a modified V-Y plasty in revision rhytidectomy surgery. *Ann Otolaryngol Rhinol.* 2015;2(11):1072.
3. El-Rouby MA, El-Sherif AF. A new technique for pixie ear deformity after lower facelift surgery. *Egypt J Surg.* 2019;43(3):371-374.
4. Fuente-del-Campo A, Lesta Campagnucci L. El lóbulo de la oreja: características, alteraciones y envejecimiento. *Rev Cirugía Plástica.* 2015;25:131-135.
5. Fuente-Del-Campo A, Lesta-Compagnucci L. Restoration of the age elongated auricular lobe. *Aesthet Surg J.* 2020;40(8):819-826.
6. Kaye KO, Casabona GR, Paprottka FJ. An update on the posterior earlobe/concha mastoid suspension suture to correct "pixie ear" following facelift: review of 40 cases. *Aesthet Surg J.* 2020:sjaa317. doi: [10.1093/asj/sjaa317](https://doi.org/10.1093/asj/sjaa317).

# AESTHETIC SURGERY JOURNAL

## OPEN FORUM

**// ASJ Open Forum, estetikte kanıta dayalı ve araştırma odaklı klinik gelişmelerin ön saflarında yer almayı hedeflemektedir. Aynı zamanda kaliteli bir klinik uygulama ve araştırma yapmak için tekrarlanabilir ve pratik yöntemler içeren kapsamlı bir kaynak konumunu almaktadır. //**

**Yucel Akgul, MD, PhD**

[@ASJm](#)
[Anesthetic Surgery Journal](#)
[Anesthetic Surgery Journal](#)
[aestheticosurgeryjournal](#)

[academic.oup.com/asjopenforum](https://academic.oup.com/asjopenforum)



**Research faculty in the plastic surgery department**  
**Follow Dr. Akgul**  
**@DrYucelAkgul**

**OXFORD**  
UNIVERSITY PRESS
